# Supplementary material for: Classification of genomic islands using decision trees and their ensemble algorithms
Source: PubMed Central journal article supplement (PMC2975412; doi:10.1186/1471-2164-11-s2-s1), 2010-11-02
Supplement: 1471-2164-11-S2-S1-S1.pdf [file 1471-2164-11-S2-S1-S1.pdf]

## Additional file 1:

TABLE I  
Feature quality (*Salmonella*)

| Salmonella |      |            |               |                |                   |
|------------|------|------------|---------------|----------------|-------------------|
| #          | G2N  | $\mu_{GI}$ | $\sigma_{GI}$ | $\mu_{non-GI}$ | $\sigma_{non-GI}$ |
| $f_1$      | 0.45 | 13.98      | 14.02         | 4.85           | 6.32              |
| $f_2$      | 0.10 | 0.01       | 0.10          | 0              | 0                 |
| $f_3$      | 0.05 | 12964.35   | 15855.83      | 14783.85       | 19354.48          |
| $f_4$      | 0.16 | 1.02       | 0.38          | 0.92           | 0.24              |
| $f_5$      | 0.37 | 0.26       | 0.44          | 0.03           | 0.18              |
| $f_6$      | 0.47 | 0.28       | 0.45          | 0.01           | 0.12              |
| $f_7$      | 0.45 | 0.27       | 0.44          | 0.01           | 0.12              |
| $f_8$      | 0.43 | 0.27       | 0.44          | 0.02           | 0.14              |

TABLE II:  
Feature quality (*Staphylococcus*)

| Staphylococcus |      |            |               |                |                   |
|----------------|------|------------|---------------|----------------|-------------------|
| #              | G2N  | $\mu_{GI}$ | $\sigma_{GI}$ | $\mu_{non-GI}$ | $\sigma_{non-GI}$ |
| $f_1$          | 0.10 | 8.96       | 5.38          | 7.39           | 11.04             |
| $f_2$          | 0.51 | 0.21       | 0.41          | 0              | 0                 |
| $f_3$          | 0.10 | 20266.18   | 20383.67      | 25432.43       | 29523.19          |
| $f_4$          | 0.43 | 1.19       | 0.33          | 0.92           | 0.30              |
| $f_5$          | 0.56 | 0.56       | 0.50          | 0.11           | 0.31              |
| $f_6$          | 0.65 | 0.56       | 0.50          | 0.07           | 0.25              |
| $f_7$          | 0.69 | 0.44       | 0.50          | 0.01           | 0.12              |
| $f_8$          | 0.19 | 0.17       | 0.38          | 0.05           | 0.23              |

TABLE III:  
Feature quality (All 3)

| All   |      |            |               |                |                   |
|-------|------|------------|---------------|----------------|-------------------|
| #     | G2N  | $\mu_{GI}$ | $\sigma_{GI}$ | $\mu_{non-GI}$ | $\sigma_{non-GI}$ |
| $f_1$ | 0.37 | 14.14      | 13.08         | 6.21           | 8.17              |
| $f_2$ | 0.37 | 0.12       | 0.33          | 0              | 0                 |
| $f_3$ | 0.05 | 15548.32   | 17226.70      | 17598.24       | 21907.29          |
| $f_4$ | 0.23 | 1.07       | 0.38          | 0.93           | 0.25              |
| $f_5$ | 0.47 | 0.40       | 0.49          | 0.06           | 0.23              |
| $f_6$ | 0.57 | 0.40       | 0.49          | 0.03           | 0.16              |
| $f_7$ | 0.54 | 0.32       | 0.47          | 0.01           | 0.11              |
| $f_8$ | 0.34 | 0.23       | 0.42          | 0.03           | 0.17              |
