# Supplementary material for: Classification of genomic islands using decision trees and their ensemble algorithms
Source: PubMed Central journal article supplement (PMC2975412; doi:10.1186/1471-2164-11-s2-s1), 2010-11-02
Supplement: 1471-2164-11-S2-S1-S2.pdf [file 1471-2164-11-S2-S1-S2.pdf]

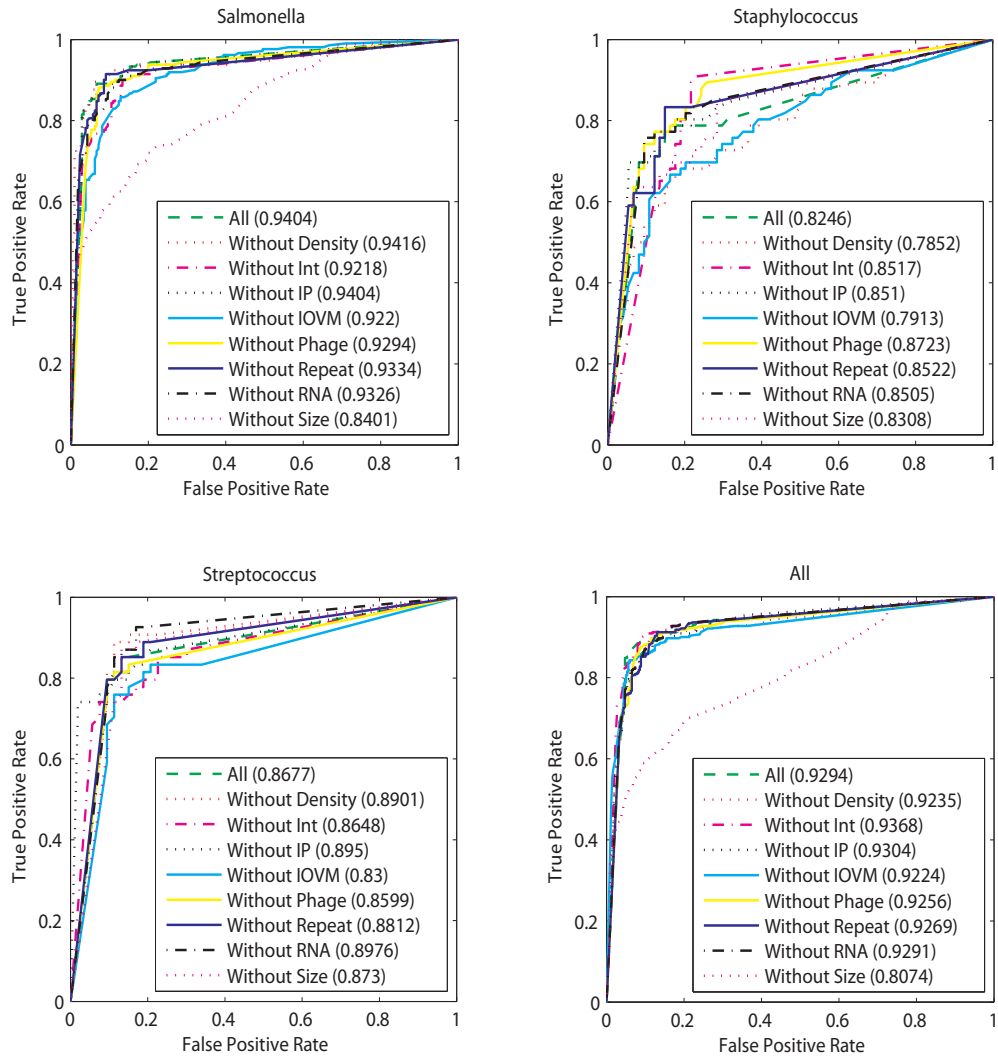

Fig. 1: ROC curves for the “leave-one-feature-out” models using adaboost.
